# Supplementary material for: Unravelling the molecular interactions behind the formation of PEG/PPG aqueous two-phase systems
Source: Royal Society of Chemistry journal article supplement (doi:10.1039/d3cp05539f), 2024-01-01
Supplement: d3cp05539f1.pdf [file d3cp05539f1.pdf]

## **Supplementary Information**

### **Unravelling the molecular interactions behind the formation of PEG/PPG aqueous two-phase systems**

Alexandre M. S. Jorge<sup>a†</sup>, Gonçalo M. C. Silva<sup>b†</sup>, João A. P. Coutinho<sup>b\*</sup>,  
Jorge F.B. Pereira<sup>a\*</sup>

<sup>a</sup>University of Coimbra, CIEPQPF, FCTUC, Department of Chemical Engineering, Rua  
Sílvio Lima, Pólo II - Pinhal de Marrocos, 3030-790 Coimbra, Portugal

<sup>b</sup>Department of Chemistry, CICECO – Aveiro Institute of Materials, University of  
Aveiro Campus Universitário de Santiago, Aveiro, 3810-193, Portugal

† Alexandre M. S. Jorge and Gonçalo M. C. Silva contributed equally to this work.

\*e-mail: [jcoutinho@ua.pt](mailto:jcoutinho@ua.pt); [jfbpereira@eq.uc.pt](mailto:jfbpereira@eq.uc.pt)

## Experimental Data

**Table S1.** Binodal curve data obtained in this study at 298K and 323K, in weight percentage (wt%).

| 298K            |                 |                           | 323K            |                 |                           |                 |                 |                           |
|-----------------|-----------------|---------------------------|-----------------|-----------------|---------------------------|-----------------|-----------------|---------------------------|
| PEG600<br>(wt%) | PPG400<br>(wt%) | H <sub>2</sub> O<br>(wt%) | PEG600<br>(wt%) | PPG400<br>(wt%) | H <sub>2</sub> O<br>(wt%) | PEG600<br>(wt%) | PPG400<br>(wt%) | H <sub>2</sub> O<br>(wt%) |
| 53.56           | 12.06           | 34.39                     | 17.60           | 64.53           | 17.86                     | 9.93            | 16.72           | 73.35                     |
| 45.86           | 12.22           | 41.93                     | 19.24           | 62.03           | 18.74                     | 7.04            | 18.64           | 74.31                     |
| 43.25           | 12.40           | 44.35                     | 26.55           | 52.93           | 20.52                     | 8.55            | 73.67           | 17.78                     |
| 41.95           | 13.33           | 44.73                     | 28.35           | 50.53           | 21.11                     | 6.89            | 74.22           | 18.89                     |
| 40.14           | 13.62           | 46.24                     | 31.29           | 46.61           | 22.10                     | 5.73            | 74.41           | 19.86                     |
| 28.43           | 20.26           | 51.31                     | 34.55           | 42.72           | 22.74                     | 2.77            | 20.54           | 76.69                     |
| 22.45           | 26.95           | 50.59                     | 36.86           | 39.73           | 23.41                     | 2.26            | 20.16           | 77.58                     |
| 19.86           | 31.32           | 48.82                     | 39.00           | 36.95           | 24.05                     | 0.00            | 23.88           | 76.12                     |
| 16.43           | 39.36           | 44.20                     | 40.82           | 34.59           | 24.59                     | 0.00            | 52.05           | 47.95                     |
| 14.85           | 44.66           | 40.49                     | 42.38           | 32.62           | 25.01                     | 1.79            | 63.66           | 34.54                     |
| 13.66           | 48.34           | 38.00                     | 43.93           | 30.69           | 25.38                     | 3.54            | 71.47           | 24.99                     |
| 11.12           | 54.86           | 34.02                     | 45.06           | 29.06           | 25.88                     | 0.00            | 20.74           | 79.26                     |
| 9.96            | 58.53           | 31.51                     | 46.89           | 26.40           | 26.72                     | 1.33            | 56.99           | 41.67                     |
| 8.65            | 62.32           | 29.03                     | 48.21           | 24.31           | 27.48                     |                 |                 |                           |
| 6.92            | 68.74           | 24.34                     | 50.38           | 20.99           | 28.64                     |                 |                 |                           |
| 58.97           | 17.04           | 23.99                     | 51.48           | 17.52           | 31.00                     |                 |                 |                           |
| 53.59           | 25.63           | 20.78                     | 51.68           | 15.69           | 32.63                     |                 |                 |                           |
| 38.60           | 44.17           | 17.22                     | 51.85           | 13.73           | 34.42                     |                 |                 |                           |
| 44.65           | 36.88           | 18.47                     | 50.39           | 11.73           | 37.88                     |                 |                 |                           |
| 48.85           | 31.86           | 19.28                     | 37.97           | 9.86            | 52.17                     |                 |                 |                           |
| 28.24           | 56.71           | 15.05                     | 35.33           | 10.51           | 54.16                     |                 |                 |                           |
| 21.14           | 64.67           | 14.19                     | 32.61           | 10.72           | 56.68                     |                 |                 |                           |
| 14.39           | 72.29           | 13.32                     | 29.60           | 11.54           | 58.86                     |                 |                 |                           |
| 11.37           | 74.69           | 13.94                     | 40.49           | 9.98            | 49.53                     |                 |                 |                           |
| 8.62            | 76.33           | 15.04                     | 32.34           | 10.49           | 57.17                     |                 |                 |                           |
| 7.09            | 76.83           | 16.08                     | 27.82           | 11.80           | 60.39                     |                 |                 |                           |
| 57.75           | 18.85           | 23.40                     | 22.02           | 12.90           | 65.08                     |                 |                 |                           |
| 59.45           | 14.83           | 25.72                     | 18.12           | 13.81           | 68.07                     |                 |                 |                           |
| 59.86           | 12.86           | 27.28                     | 14.53           | 14.90           | 70.57                     |                 |                 |                           |

**Table S2.** Binodal curve data retrieved for Malmsten et al. <sup>12</sup> at 298K and 323K, in weight percentage (wt%).

| 298K         |              |                        | 323K         |              |                        |              |              |                        |
|--------------|--------------|------------------------|--------------|--------------|------------------------|--------------|--------------|------------------------|
| PEG600 (wt%) | PPG400 (wt%) | H <sub>2</sub> O (wt%) | PEG600 (wt%) | PPG400 (wt%) | H <sub>2</sub> O (wt%) | PEG600 (wt%) | PPG400 (wt%) | H <sub>2</sub> O (wt%) |
| 13.00        | 72.00        | 15.00                  | 0.00         | 70.00        | 30.00                  | 0.00         | 25.00        | 75.00                  |
| 20.00        | 64.00        | 16.00                  | 4.00         | 71.00        | 25.00                  | 0.00         | 33.00        | 67.00                  |
| 25.00        | 60.00        | 15.00                  | 8.00         | 70.00        | 22.00                  | 0.00         | 40.00        | 60.00                  |
| 29.00        | 54.00        | 17.00                  | 12.00        | 68.00        | 20.00                  | 0.00         | 48.00        | 52.00                  |
| 32.00        | 49.00        | 19.00                  | 17.00        | 63.00        | 20.00                  | 0.00         | 56.00        | 44.00                  |
| 37.00        | 44.00        | 19.00                  | 20.00        | 59.00        | 21.00                  | 0.00         | 62.00        | 38.00                  |
| 39.00        | 40.00        | 21.00                  | 25.00        | 55.00        | 20.00                  |              |              |                        |
| 44.00        | 35.00        | 21.00                  | 28.00        | 49.00        | 23.00                  |              |              |                        |
| 47.00        | 31.00        | 22.00                  | 31.00        | 45.00        | 24.00                  |              |              |                        |
| 50.00        | 27.00        | 23.00                  | 35.00        | 41.00        | 24.00                  |              |              |                        |
| 54.00        | 23.00        | 23.00                  | 38.00        | 38.00        | 24.00                  |              |              |                        |
| 56.00        | 19.00        | 25.00                  | 40.00        | 32.00        | 28.00                  |              |              |                        |
| 54.00        | 15.00        | 31.00                  | 42.00        | 28.00        | 30.00                  |              |              |                        |
| 49.00        | 14.00        | 37.00                  | 45.00        | 25.00        | 30.00                  |              |              |                        |
| 42.00        | 13.00        | 45.00                  | 48.00        | 21.00        | 31.00                  |              |              |                        |
| 36.00        | 16.00        | 48.00                  | 47.00        | 15.00        | 38.00                  |              |              |                        |
| 32.00        | 18.00        | 50.00                  | 41.00        | 12.00        | 47.00                  |              |              |                        |
| 29.00        | 20.00        | 51.00                  | 31.00        | 12.00        | 57.00                  |              |              |                        |
| 27.00        | 22.00        | 51.00                  | 26.00        | 13.00        | 61.00                  |              |              |                        |
| 25.00        | 25.00        | 50.00                  | 21.00        | 13.00        | 66.00                  |              |              |                        |
| 23.00        | 29.00        | 48.00                  | 18.00        | 13.00        | 69.00                  |              |              |                        |
| 20.00        | 32.00        | 48.00                  | 13.00        | 13.00        | 74.00                  |              |              |                        |
| 20.00        | 37.00        | 43.00                  | 11.00        | 13.00        | 76.00                  |              |              |                        |
| 17.00        | 42.00        | 41.00                  | 9.00         | 14.00        | 77.00                  |              |              |                        |
| 15.00        | 46.00        | 39.00                  | 5.00         | 14.00        | 81.00                  |              |              |                        |
| 10.00        | 59.00        | 31.00                  | 3.00         | 16.00        | 81.00                  |              |              |                        |
| 6.00         | 69.00        | 25.00                  | 2.00         | 17.00        | 81.00                  |              |              |                        |
| 8.00         | 72.00        | 20.00                  | 1.00         | 18.00        | 81.00                  |              |              |                        |
|              |              |                        | 0.00         | 20.00        | 80.00                  |              |              |                        |

**Table S3.** Binodal curve data obtained in this study at 298K and 323K, in mol fraction (mol%).

| 298K             |                  |                            | 323K             |                  |                            |                  |                  |                            |
|------------------|------------------|----------------------------|------------------|------------------|----------------------------|------------------|------------------|----------------------------|
| PEG600<br>(mol%) | PPG400<br>(mol%) | H <sub>2</sub> O<br>(mol%) | PEG600<br>(mol%) | PPG400<br>(mol%) | H <sub>2</sub> O<br>(mol%) | PEG600<br>(mol%) | PPG400<br>(mol%) | H <sub>2</sub> O<br>(mol%) |
| 4.40             | 1.48             | 94.12                      | 2.48             | 13.64            | 83.88                      | 0.40             | 1.01             | 98.59                      |
| 3.14             | 1.25             | 95.61                      | 2.61             | 12.63            | 84.76                      | 0.28             | 1.11             | 98.61                      |
| 2.81             | 1.21             | 95.98                      | 3.36             | 10.05            | 86.59                      | 1.20             | 15.52            | 83.28                      |
| 2.70             | 1.29             | 96.01                      | 3.51             | 9.38             | 87.11                      | 0.92             | 14.88            | 84.20                      |
| 2.51             | 1.28             | 96.22                      | 3.73             | 8.34             | 87.92                      | 0.74             | 14.32            | 84.94                      |
| 1.61             | 1.72             | 96.68                      | 4.03             | 7.48             | 88.48                      | 0.11             | 1.19             | 98.70                      |
| 1.28             | 2.31             | 96.41                      | 4.20             | 6.80             | 89.00                      | 0.09             | 1.16             | 98.76                      |
| 1.17             | 2.77             | 96.05                      | 4.35             | 6.18             | 89.46                      | 0.00             | 1.39             | 98.61                      |
| 1.06             | 3.81             | 95.13                      | 4.47             | 5.69             | 89.84                      | 0.00             | 4.66             | 95.34                      |
| 1.04             | 4.68             | 94.28                      | 4.58             | 5.29             | 90.13                      | 0.14             | 7.65             | 92.21                      |
| 1.01             | 5.36             | 93.63                      | 4.69             | 4.92             | 90.39                      | 0.38             | 11.36            | 88.26                      |
| 0.91             | 6.70             | 92.39                      | 4.74             | 4.58             | 90.68                      | 0.00             | 1.16             | 98.84                      |
| 0.87             | 7.65             | 91.49                      | 4.80             | 4.05             | 91.15                      | 0.09             | 5.79             | 94.12                      |
| 0.81             | 8.74             | 90.45                      | 4.82             | 3.64             | 91.54                      |                  |                  |                            |
| 0.75             | 11.19            | 88.06                      | 4.86             | 3.04             | 92.10                      |                  |                  |                            |
| 6.67             | 2.89             | 90.44                      | 4.63             | 2.37             | 93.00                      |                  |                  |                            |
| 6.83             | 4.90             | 88.27                      | 4.44             | 2.02             | 93.53                      |                  |                  |                            |
| 5.69             | 9.76             | 84.55                      | 4.25             | 1.69             | 94.06                      |                  |                  |                            |
| 6.24             | 7.73             | 86.03                      | 3.79             | 1.32             | 94.89                      |                  |                  |                            |
| 6.61             | 6.46             | 86.93                      | 2.12             | 0.83             | 97.06                      |                  |                  |                            |
| 4.59             | 13.83            | 81.57                      | 1.90             | 0.85             | 97.25                      |                  |                  |                            |
| 3.58             | 16.41            | 80.01                      | 1.68             | 0.83             | 97.49                      |                  |                  |                            |
| 2.54             | 19.14            | 78.32                      | 1.47             | 0.86             | 97.66                      |                  |                  |                            |
| 1.93             | 19.05            | 79.02                      | 2.37             | 0.88             | 96.75                      |                  |                  |                            |
| 1.38             | 18.33            | 80.29                      | 1.66             | 0.81             | 97.54                      |                  |                  |                            |
| 1.08             | 17.50            | 81.42                      | 1.35             | 0.86             | 97.79                      |                  |                  |                            |
| 6.67             | 3.27             | 90.06                      | 1.00             | 0.88             | 98.13                      |                  |                  |                            |
| 6.33             | 2.37             | 91.30                      | 0.79             | 0.90             | 98.32                      |                  |                  |                            |
| 6.06             | 1.95             | 91.99                      | 0.61             | 0.94             | 98.46                      |                  |                  |                            |



**Table S4.** Thermodynamic properties of the binary systems PEG600/H<sub>2</sub>O and PPG400/H<sub>2</sub>O as function of water molar fraction ( $x_w$ ).  $H^E$  (MF),  $H^E$  (HB) and  $H^E$  (VDW) correspond to the excess enthalpy of the binary mixture caused by misfit/electrostatic interactions, hydrogen bonds and Van der Waals forces, respectively. “Total  $H^E$ ” and “Total  $G^E$ ” correspond to the excess enthalpy and excess free Gibbs energy of the system.

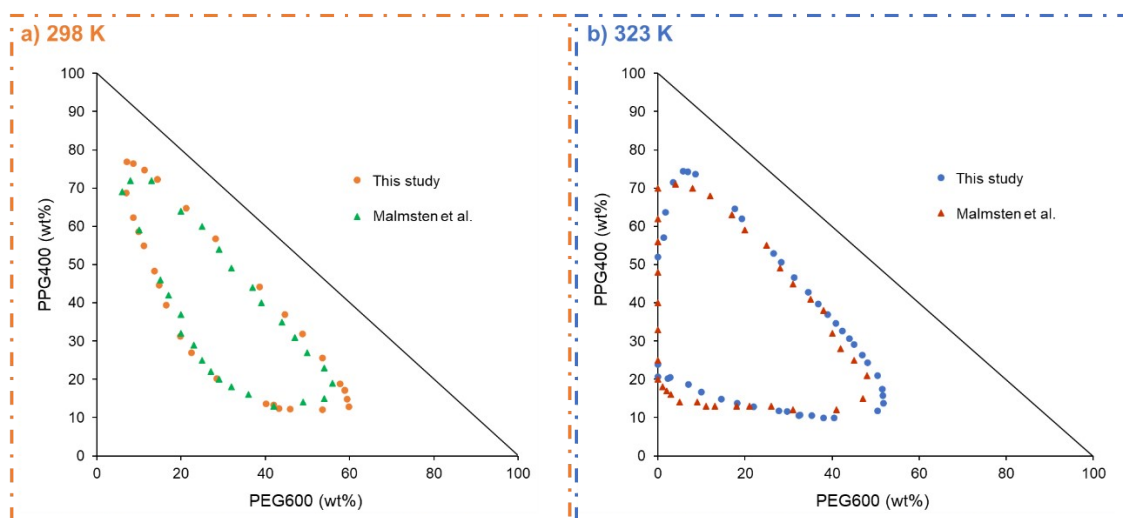

**Figure S1.** Experimental phase diagrams of PEG600/PPG400/H<sub>2</sub>O at 298K (a) and 323K (b), and atmospheric pressure. The full circles correspond to the experimental data of this study and the full triangles the data retrieved from Malmsten et al.<sup>12</sup> by manual drawing and eye assessment of the mixture points within the equilibrium curve.

## S2. Simulation Results

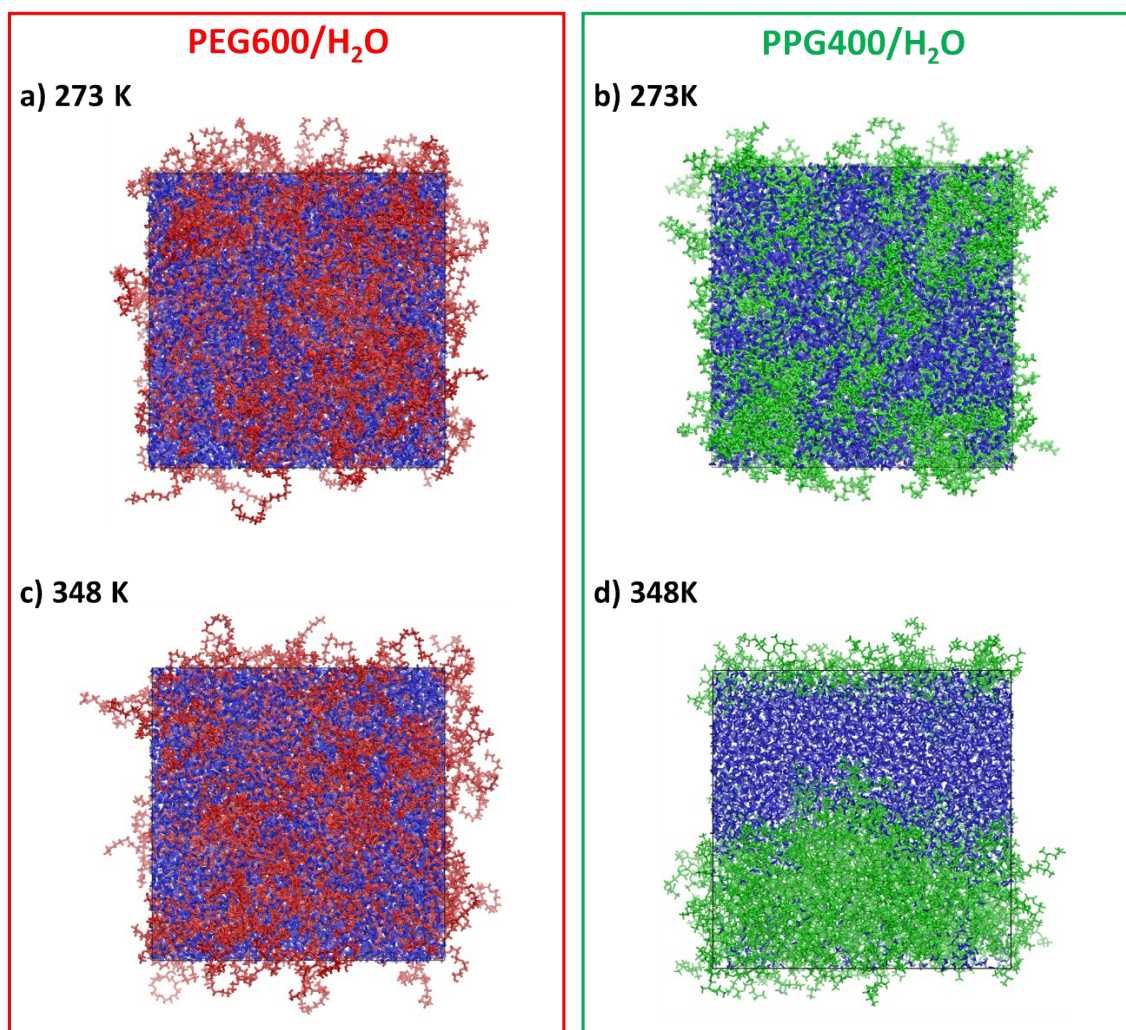

**Figure S2.** Snapshots from MD simulations of the binary systems containing 1:1 mass ratio of PEG600 and H<sub>2</sub>O (**a** and **c**), and PPG400 and H<sub>2</sub>O (**c** and **d**), at 273 K and 348 K. PEG600, PPG400 and water are represented by red, green and blue colors, respectively.



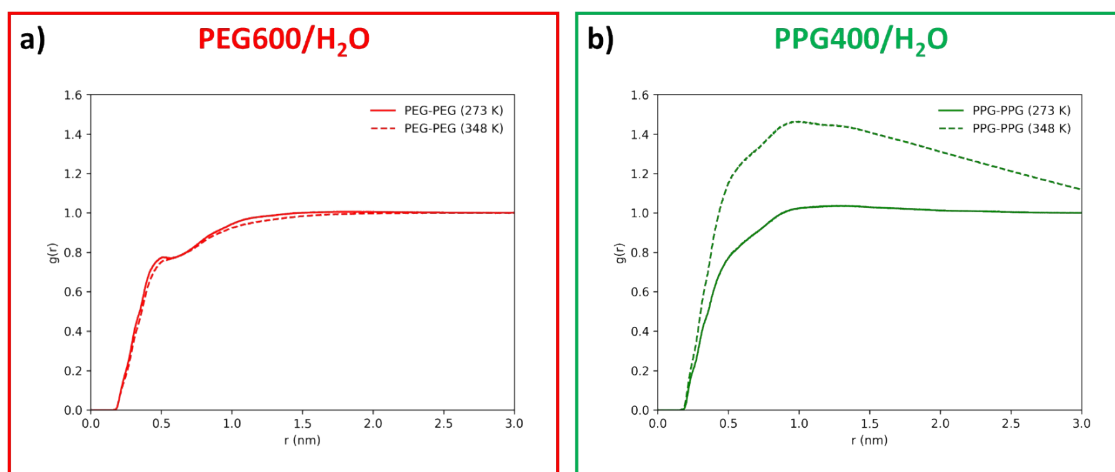

**Figure S3.** Radial distribution functions between the polymeric moieties obtained from MD simulations of the binary systems containing 1:1 mass ratio of PEG600 and H<sub>2</sub>O (**a**), and PPG400 and H<sub>2</sub>O (**b**), at 273 K (solid lines) and 348 K (dashed lines). The red and green curves correspond to PEG600-PEG600 and PPG400-PPG400 pairs, respectively.

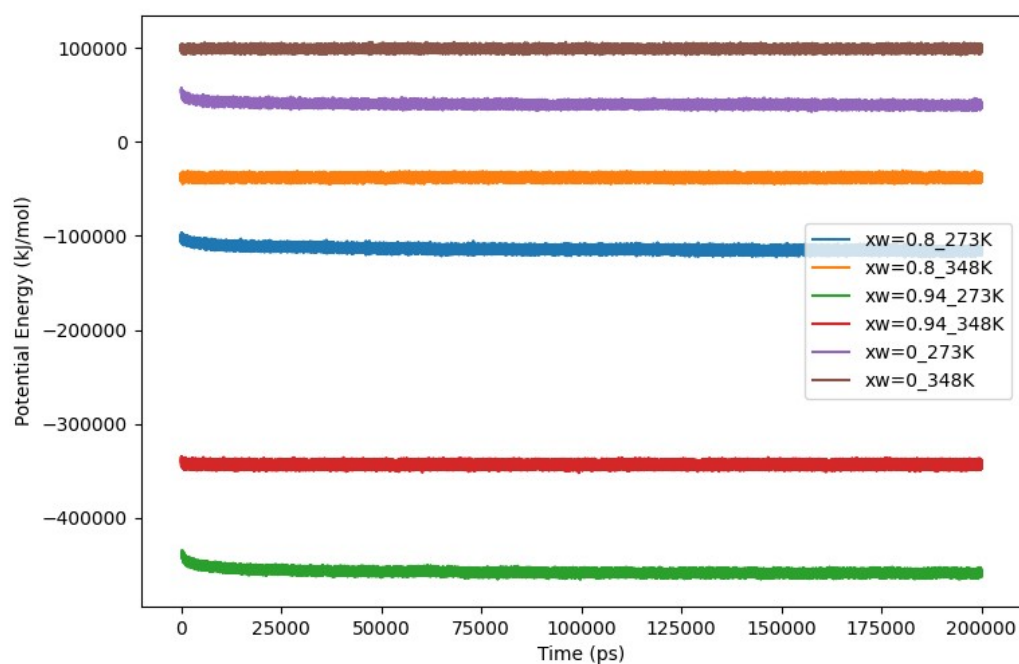

**Figure S4.** Evolution of the total potential energy throughout the time length of each simulation.

### S3. Simulation Details

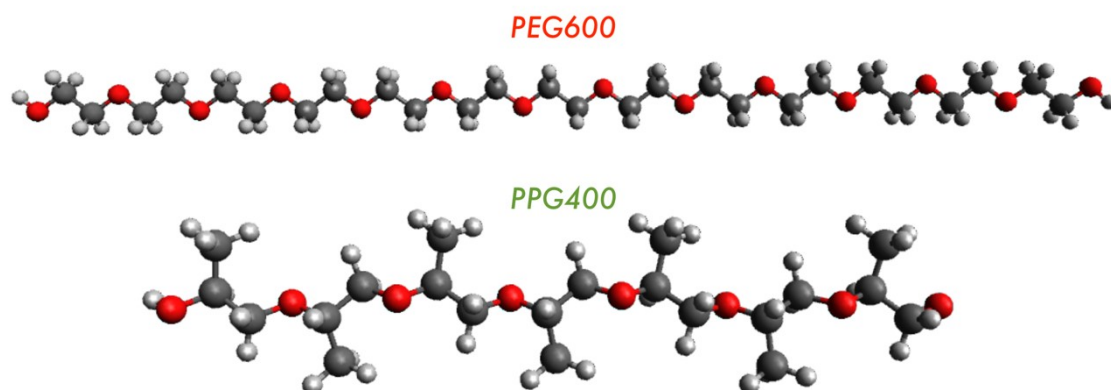

**Figure S5.** Molecular structure of PEG600 ( $C_{26}H_{54}O_{14}$ ) and PPG400 ( $C_{21}H_{44}O_8$ ). Color scheme: hydrogen – white, carbon – gray and oxygen – red.

**Table S5.** Number of molecules used in the simulations boxes for each system.

| System                  | PEG600 | PPG400 | H <sub>2</sub> O |
|-------------------------|--------|--------|------------------|
| $x_w=0$                 | 300    | 300    | 0                |
| $x_w=0.8$               | 300    | 300    | 2400             |
| $x_w=0.94$              | 300    | 300    | 9400             |
| PEG600/H <sub>2</sub> O | 300    | 0      | 10000            |
| PEG600/H <sub>2</sub> O | 0      | 300    | 7100             |

The input files, including topology, coordinate and control files can be found on the following repository: [https://github.com/goncalosilva20/PEG600\\_PPG400\\_Water](https://github.com/goncalosilva20/PEG600_PPG400_Water).
